# Supplementary material for: PET and polyolefin plastics supply chains in Michigan: present and future systems analysis of environmental and socio-economic impacts
Source: Frontiers journal article supplement (doi:10.3389/frsus.2024.1405427), 2024-05-23
Supplement: Data_Sheet_1.XLSX [file Data_Sheet_1.XLSX]

## Sheet: Virgin Resins_LCIA
			Plastic type	GWP (MT CO2-eq/MT of resin)	Total Energy Demand (MJ/MT of resin)	Source
			PET	2.23	61400	Franklin Associates, CRADLE-TO-RESIN LIFE CYCLE ANALYSIS OF POLYETHYLENE TEREPHTHALATE RESIN Final Revised Report. Available at: https://napcor.com/wp-content/uploads/2020/05/Final-Revised-Virgin-PET-Resin-LCA.pdf
			HDPE	1.61	73800	Franklin Associates, CRADLE-TO-GATE LIFE CYCLE ANALYSIS OF HIGH-DENSITY POLYETHYLENE (HDPE) RESIN. Available at: https://www.americanchemistry.com/better-policy-regulation/plastics/resources/cradle-to-gate-life-cycle-analysis-of-high-density-polyethylene-hdpe-resin
			LDPE	1.93	80300	Franklin Associates, CRADLE-TO-GATE LIFE CYCLE ANALYSIS OF LOW-DENSITY POLYETHYLENE (LDPE) RESIN. Available at: https://www.americanchemistry.com/better-policy-regulation/plastics/resources/cradle-to-gate-life-cycle-analysis-of-low-density-polyethylene-ldpe-resin
			LLDPE	1.47	72800	Franklin Associates, CRADLE-TO-GATE LIFE CYCLE ANALYSIS OF LINEAR LOW-DENSITY POLYETHYLENE (LLDPE) RESIN. Available at: https://www.americanchemistry.com/better-policy-regulation/plastics/resources/cradle-to-gate-life-cycle-analysis-of-linear-low-density-polyethylene-lldpe-resin
			PP	1.55	75500	Franklin Associates, CRADLE-TO-GATE LIFE CYCLE ANALYSIS OF POLYPROPYLENE (PP) RESIN. Available at: https://www.americanchemistry.com/better-policy-regulation/plastics/resources/cradle-to-gate-life-cycle-analysis-of-polypropylene-pp-resin

## Sheet: Semi-mfg._LCIA
			Process	GWP (MT CO2-eq/MT)	Total Energy Demand (MJ/kg)	Waste						For 'all other conversion processes' category
		Molding processes	Blow moulding	1	27.9	0.003						Type of plastic	GWP (MT CO2-eq/MT)	Total Energy Demand (MJ/kg)	Waste	Comments
			Injection moulding	1.03	26.2	0.006						HDPE	1.12	26.4	0.0126667	Average includes molding, extrusion, fleece production, foaming/expanding, thermoforming only processes
			Stretch blow moulding	1.25	30.8	0.022						PP	0.624444	15.6733	0.0102222	Average includes molding, extrusion, foaming/expanding, thermoforming only processes. Average of foaming/expanding and thermoforming only: 0.42 kg CO2-eq/kg; 9.86 MJ/kg; 1 % waste. Fleece production is already accounted towards fiber extrusion because the amount of PP used in fiber extrusion is known (refer to MFA SI excle file).
			Avg.	1.09333	28.3	0.0103333						LDPE/LLDPE	0.674444	16.1867	0.00688889	Average includes molding, extrusion, foaming/expanding.
												PET	0.356667	9.56667	0.0156667	Average includes Film extrusion, sheet extrusion, and thermoforming only processes.
		Extrusion Processes	Film extrusion	0.413	10.7	0.024
			Pipe extrusion	0.32	7.6	0.004
			Calendering, Sheets	0.347	8.28	0.003						LDPE/LLDPE (Sheet/Pipes)	0.3335	7.94	0.0035	For 'sheet/pipe' semi-manufacturing process category in the LDPE/LLDPE MFA diagram, we took an average of pipe and sheet extrusion, as film extrusion has already been accounted for flow of LDPE/LLDPE through 'Film Extrusion'.
			Avg.	0.36	8.86	0.0103333
			Fleece production	4.84	105	0.032
			Foaming, expanding	0.57	11.4	0
			Thermoforming with calendering	0.657	18	0.023
			Thermoforming only (no calendering)	0.31	9.72	0.02
			Avg.	1.90667	42.04	0.0173333
												Resins used in different conversion processes					Source
												HDPE	Injection molding, Compression molding, Coating, Extrusion, Laminating, Sheet forming, Blow molding, Rotational molding, Structural foam, Thermoforming				Rosato, Dominick V., Donald V. Rosato, and Matthew v Rosato. Plastic product material and process selection handbook. Elsevier, 2004. (page no. 122 and 315)
			1. All of the values mentioned above were obtained from Simparo software and Ecoinvent 3.3 database. 2. The electricity profile was updated to represent 2020 Michigan grid (see Methods section of the manuscript for the distribution)									LDPE/LLDPE	Injection molding, Compression molding, Coating, Extrusion, Laminating, Sheet forming, Blow molding, Rotational molding, Structural foam
												PP	Injection molding, Extrusion, Sheet Forming, Blow molding, Rotational molding, Structural foam, Thermofroming
												PET	Injection molding, Coating, Extrusion, Blow molding, Rotational molding, Thermofroming

## Sheet: EOL_LCIA
		Landfill					Incineration with Energy Recovery
		Plastic type	GWP (MT CO2-eq/ MT resin)	CED (MJ/ kg of resin)			Plastic type	GWP (MT CO2-eq/MT resin)	CED (MJ/ kg of resin)
		PET	0.022	0.31			PET	1.37	-11.62
		HDPE	0.022	0.31			HDPE	1.42	-21.9
		LDPE	0.022	0.31			LDPE	1.42	-21.77
		PP	0.022	0.31			PP	1.42	-21.85
		LLDPE	0.022	0.31			LLDPE	1.42	-21.85
		LDPE/LLDPE	0.022	0.31			LDPE/LLDPE	1.42	-21.81
		Source
		https://www.epa.gov/warm/documentation-chapters-greenhouse-gas-emission-energy-and-economic-factors-used-waste
		NOTE
		The values in WARM reports are based on 'U.S. Short Tons' and were converted to 'Metric Tons' to be consistent with units in our analysis. The CED factors in WARM reports are given in the units of 'MMBTU/Short Ton' and were converted to 'MJ/kg'.
			Deposit containers (Compacting and baling); Electricity grid updated to represent Michigan average electricity grid mix				PE film compacting and baling
			Plastic type	GHG emissions (MT CO2-eq/MT)	CED (MJ/MT)		Plastic type	GHG emissions (MT CO2-eq/MT)	CED (MJ/MT)
			PET	0.0369	559		PE	0.025	160
			Collection, Sorting and Baling at MRF					Mechanical recycling (Cradle-to-gate; Collection, sorting, baling, transportation to reclaimer, and reclaimer processes )			Mechanical recycling (Gate-to-gate; Exlcuding collection, sorting and baling at MRF)
				GWP (MT CO2-eq/ MT baled resin)	CED (MJ/ MT of baled resin)			GWP (MT CO2-eq/ MT recycled resin)	CED (MJ/ MT of recycled resin)		GWP (MT CO2-eq/ MT recycled resin)	CED (MJ/ MT of recycled resin)
			PET	0.066	960		PET	0.91	14800		0.828	13610
			HDPE	0.079	1206		HDPE	0.56	8690		0.46	7170
			PP	0.089	1333		PP	0.53	8890		0.42	7250
							LDPE/LLDPE	-	-		0.44	7210
			Based on Franklin Associates Report (referenced in Manuscript, Table 1)				Based on Franklin Associates Report (referenced in Manuscript, Table 1)				Based on Franklin Associates Report (referenced in Manuscript, Table 1)

## Sheet: PET_MFA
		Comment
Michigan GDP of plastics and rubber product mfg ($ MM), 6th state, NAICS Code 326 (OH, IL, TX, CA, PA, MI)	4073.1	Source						Mass (Metric Tons, MT)	Comment
U.S. GDP of plastics and rubber product mfg ($ MM), NAICS Code 326	83799						V-PET use in Michigan	319205
Michigan contribution to US GDP of plastics and rubber product mfg, NAICS codes 326	0.0486056
							V-PET in ISBM	39598									Emissions (MT CO2-eq)	Mass (MT)			Energy (MJ)
Michigan Employment in plastic product mfg, NAICS Code 3261	46989	Source					R-PET in ISBM	5363.66								Virgin resin	711827			Virgin resin	1.95992e+10
U.S. employment in plastic and product mfg, NAICS Code 3261	655529						Waste at ISBM	989.156	0.022							ISBM	54965.6	43972.5		ISBM	1.35435e+09
Michigan contribution to US GDP of plastics product mfg, NAICS codes 3261	0.071681						V-PET in Thermoform	279607								Others	203787	310178		Others	5.58321e+09
							R-PET in thermoforms	37873.5
Avg. contribution of Michigan by GDP and Employment	0.0601433						Waste at thermoform	7302.05	0.023							Landfill	2869.54	130434		Landfill	4.04344e+07
																Incineration with energy recovery	3674.63	2682.21		Incineration with energy recovery	-3.11673e+07
V-PET available in the U.S.	5.3074	MMT					Total post-industrial waste	8291.21								Compacting and baling	974.863	26419		Compacting and baling	1.47682e+07
							landfilled	7130.44	Refer to Methods section							MRF	1982.65	30040.1		MRF	2.88385e+07
Michigan Employment_All other plastic product mfg NAICS code 326199	36990	Source					Incinerated	165.824	Refer to Methods section							Mechanical recycling	36207.8	44132.6		Mechanical recycling	5.95084e+08
U.S. Employment_All other plastic product mfg NAICS code 326199	386178						To mechanical recycling	994.945	Refer to Methods section							Transportation	12613.1			Transportation	1.68737e+08
Michigan contribution to US NAICS code 326199 by employment	0.0957848						Recycled resin	895.45	Due to lack of U.S. LCA data on post-industrial plastic waste, authors assumed to be 10% of loss, which is 50% of waste produced during mechanical recycling of post-consumer waste. Post-industrial plastic waste is comparatively clean or high-quality than post-consumer waste, and therefore would require much less pretreatment cleaning steps.							Total	317075	MTCO2-eq		Total	7.75426e+09	MJ
							landfilled	97.5046	Estimated, Conventional management of MSW disposed, 98% landfilled and 2% incinerated								0.317075	MMT CO2-eq			7.75426	PJ
Michigan Revenue_NAICS code 32619 Plastic Products Miscellaneous Manufacturing in Michigan ($ MM)	9608	Source					Incinerated	1.98989	Estimated, Conventional management of MSW disposed, 98% landfilled and 2% incinerated
U.S. Revenue_NAICS code 32619 Plastic Products Miscellaneous Manufacturing in the US ($ MM)	124940	Source					Int'l. Imports of semi-manufactured PET products, including fiber	4715.29												MI state energy consumption	3039	PJ
Michigan contribution to US NAICS code 32619 by revenue	0.0769009						Int'l. Exports of semi-manufactured PET products, including fiber	559.019								National PET Supply chain GHG emissions	22.88	MMT CO2-eq		Industrial sector energy consumption	744.025	PJ
							Net trade	4156.27	'+' indicates net import and '-' indicates net exports							MI state GHG emissiosn	190.89	MMT CO2-eq
Avg. of emplyoment and revenue_All other	0.0863429						Input to manufacturing sector	358866												National PET Supply chain energy consumption	512.9	PJ
							Output from manufacturing sector (exports + waste generated)	171929								MI contribution to U.S. PET supply chain	0.0138582
Michigan Employment_Bottle mfg_NAICS Code 32616 Plastic Bottle Manufacturing in Michigan	426	Source					In-use stock	186937								PET supply chain contribution to Michigan emissions	0.00166104			MI contribution to U.S. PET supply chain	0.0151185
U.S. Employment_Bottle mfg NAICS Code 32616 Plastic Bottle Manufacturing in the US	33312	Source																		PET supply chain contribution to Michigan energy	0.00255158
Michigan contribution to US NAICS code 32616 by employment	0.0127882						EOL													PET supply chain contribution to Michigan industrial energy	0.010422
							Containers and packaging (C&P)
Michigan Revenue_Bottle mfg ($ MM) NAICS Code 32616 Plastic Bottle Manufacturing in Michigan	164	Source					PET bottles landfilled	52480.7	2021 NextCycle Michigan Gap analysis
U.S. Revenue_Bottle mfg ($ MM) NAICS Code 32616 Plastic Bottle Manufacturing in the US	14056	Source					PET bottles collected for sorting and recycling	58241.3	2021 NextCycle Michigan Gap analysis
Michigan contribution to US NAICS code 32616 by revenue	0.0116676						Collected via container deposit program	26419	2021 NextCycle Michigan Gap analysis
							Collected via curbside collection and going to MRFs	31822.2	2021 NextCycle Michigan Gap analysis
Avg. of emplyoment and revenue_Bottle	0.0122279						PET bottles incinerated	1071.03	Estimated, Conventional management of MSW disposed, 98% landfilled and 2% incinerated
							Total PET bottle waste generated	111793
Applications of PET in Michigan based on average employment and revenue							PET generated in other packaging	20134.8	Adjusted based on per capita basis and EPA data
Thermoforming	0.875948						Other PET collected for sorting and recycling	1930.73	Adjusted based on per capita basis and EPA data
ISBM	0.124052						Other PET landfilled	17840	Estimated, Conventional management of MSW disposed, 98% landfilled and 2% incinerated
							Other PET incinerated	364.081	Estimated, Conventional management of MSW disposed, 98% landfilled and 2% incinerated
Michigan no. of thermoformers	14	Source					Total C&P PET waste generated	131928
U.S. no. of thermoformers	331						Total C&P PET waste landfilled	70320.6
Michigan contribution	0.0422961						Total C&P PET waste incinerated	1435.11
							Total C&P PET waste collected for sorting and recycling	60172
Michigan no. of bottle converters	1	Source					Total PET in non-durable	21238.1	Adjusted based on per capita and EPA data
U.S. no. of bottle converters	133						lanfilled	20813.3	Estimated, Conventional management of MSW disposed, 98% landfilled and 2% incinerated
Michigan contribution	0.0075188						Incinerated	424.761	Estimated, Conventional management of MSW disposed, 98% landfilled and 2% incinerated
Applications of PET in Michigan based on no. of converters (not used in this study)							Total PET in durable	18204.1	Adjusted based on per capita and EPA data
Thermoformers	0.849065						lanfilled	17840	Estimated, Conventional management of MSW disposed, 98% landfilled and 2% incinerated
Bottle converters	0.150935						Incinerated	364.081	Estimated, Conventional management of MSW disposed, 98% landfilled and 2% incinerated
							Total PET waste generated	171370
Total Exports of HTS Code 3915.90	5317.84	MT					Total post-consumer waste landfilled	108974
Share of PET resin collected for sorting and recycling based on US EPA, excluding HDPE and LDPE/LLDPE	0.453704						Total post-consumer waste incinerated	2223.96
Share of PP resin collected for sorting and recycling based on US EPA, excluding HDPE and LDPE/LLDPE	0.0231481						Material Recovery Facility (MRF)
Share of other resins collected for sorting and recycling based on US EPA, excluding HDPE and LDPE/LLDPE	0.523148						Total PET through MRF	33753
	1						Total waste at MRF	3712.83	0.11
Total PET, PP, and other resins excluding HDPE and LDPE/LLDPE	1959.52	MT					Landfilled	3638.57	Estimated, Conventional management of MSW disposed, 98% landfilled and 2% incinerated
							Inicnerated	74.2565	Estimated, Conventional management of MSW disposed, 98% landfilled and 2% incinerated
							output from MRF	30040.1
Transportation							Int'l. Import	0	Negligible
Plastics and rubber (NAICS Code 326)							Int'l. Export	2412.72
Total metrics tons of NAICS code 326 in Michigan	2.86761e+06	MT	Source
Total metrics tons of NAICS code 326 in US	203935188	MT	Source				To Mechanical recycling
Michigan contribution to US	0.0140614						PET to reclaimers	54046.5
							Waste at mechanical recycling	10809.3	0.2
							Landfilled	10593.1	Estimated, Conventional management of MSW disposed, 98% landfilled and 2% incinerated
							Incinerated	216.186	Estimated, Conventional management of MSW disposed, 98% landfilled and 2% incinerated
							Total R-PET produced	43237.2
							R-PET in ISBM	5363.66
1 US ton is equal to	0.907185	MT					R-Pet in others	37873.5

## Sheet: PET_Scenario_MFA
		Comment
Michigan (MI) GDP of plastics and rubber product mfg ($ MM), 6th state, NAICS Code 326 (OH, IL, TX, CA, PA, MI)	4073.1	Source						Mass (MT)	Comment
US GDP of plastics and rubber product mfg ($ MM), NAICS Code 326	83799						V-PET use in Michigan	296227
MI contribution to US GDP of plastics and rubber product mfg, NAICS codes 326	0.0486056
							V-PET in ISBM	36747.5									Emissions (MT CO2-eq)	Mass (MT)			Energy (MJ)
MI Employment in plastic product mfg, NAICS Code 3261	46989	Source					R-PET in ISBM	8214.12								Virgin resin	660586			Virgin resin	1.81883e+10
US employment in plastic and product mfg, NAICS Code 3261	655529						Waste at ISBM	989.156	0.022							ISBM	54965.6	43972.5		ISBM	1.35435e+09
MI contribution to US GDP of plastics product mfg, NAICS codes 3261	0.071681						V-PET in Thermoform	259479								Others	203787	310178		Others	5.58321e+09
							R-PET in thermoforms	58001.1
Avg. contribution of Michigan by GDP and Employment	0.0601433						Waste at thermoform	7302.05	0.023							Landfill	2374.13	107915		Landfill	3.34537e+07
																Incineration with energy recovery	3045.04	2222.65		Incineration with energy recovery	-2.58272e+07
V-PET available in the U.S.	5.3074	MMT, Chaudhari et al., 2022					Total post-industrial waste	8291.21								Compacting and baling	1482.51	40176.5		Compacting and baling	2.24587e+07
							landfilled	7130.44	Refer to Methods section							MRF	2970.34	45005.2		MRF	4.3205e+07
MI Employment_All other plastic product mfg NAICS code 326199	36990	Source					Incinerated	165.824	Refer to methods section							Mechanical recycling	55233.6	67110.6		Mechanical recycling	9.07815e+08
US Employment_All other plastic product mfg NAICS code 326199	386178						To mechanical recycling	994.945	Refer to Methods section							Transportation	13799.8			Transportation	1.84612e+08
Michigan contribution to US NAICS code 326199 by employment	0.0957848						Recycled resin	895.45	Due to lack of U.S. LCA data on post-industrial plastic waste, authors assumed to be 10% of loss, which is 50% of waste produced during mechanical recycling of post-consumer waste. Post-industrial plastic waste is comparatively clean or high-quality than post-consumer waste, and therefore would require much less pretreatment cleaning steps.							Total	337658	MTCO2-eq		Total	8.10328e+09	MJ
							Landfilled waste	97.5046	Estimated, Conventional management of MSW disposed, 98% landfilled and 2% incinerated								0.337658	MMT CO2-eq			8.10328	PJ
MI Revenue_NAICS code 32619 Plastic Products Miscellaneous Manufacturing in Michigan ($ MM)	9608	Source					Incinerated waste	1.98989	Estimated, Conventional management of MSW disposed, 98% landfilled and 2% incinerated							Avoided emissions	-51241	MTCO2-eq		Avoided energy	-1.41085e+09	MJ
US Revenue_NAICS code 32619 Plastic Products Miscellaneous Manufacturing in the US ($ MM)	124940	Source														Net	0.286417	MMT CO2-eq		Net	6.69243	PJ
Michigan contribution to US NAICS code 32619 by revenue	0.0769009						Int'l. Imports of semi-manufactured PET products, including fiber	4715.29
							Int'l. Exports of semi-manufactured PET products, including fiber	559.019								National PET Supply chain GHG emissions (2019)	22.88	MMT CO2-eq		MI state energy consumption (2019)	3039	PJ
Avg. of emplyoment and revenue_All other	0.0863429						Net trade	4156.27	'+' indicates net import and '-' indicates net exports							MI state GHG emissions (2019)	190.89	MMT CO2-eq		Industrial sector energy consumption (2019)	744.025	PJ
							Input to manufacturing sector	358866
MI Employment_Bottle mfg_NAICS Code 32616 Plastic Bottle Manufacturing in Michigan	426	Source					Output from manufacturing sector (exports + waste generated)	171929								MI contribution to U.S. PET supply chain	0.0125182			National PET Supply chain energy consumption (2019)	512.9	PJ
US Employment_Bottle mfg NAICS Code 32616 Plastic Bottle Manufacturing in the US	33312	Source					In-use stock	186937								PET supply chain contribution to Michigan emissions	0.00150043
Michigan contribution to US NAICS code 32616 by employment	0.0127882																			MI contribution to U.S. PET supply chain	0.0130482
							EOL													PET supply chain contribution to Michigan energy	0.00220218
MI Revenue_Bottle mfg ($ MM) NAICS Code 32616 Plastic Bottle Manufacturing in Michigan	164	Source					Containers and packaging (C&P)													PET supply chain contribution to Michigan industrial energy	0.0089949
US Revenue_Bottle mfg ($ MM) NAICS Code 32616 Plastic Bottle Manufacturing in the US	14056	Source					PET bottles landfilled	22520	2021 NextCycle Michigan Gap analysis
Michigan contribution to US NAICS code 32616 by revenue	0.0116676						PET bottles collected for sorting and recycling	88813.4	2021 NextCycle Michigan Gap analysis
							Collected via container deposit program	40176.5	2021 NextCycle Michigan Gap analysis
Avg. of emplyoment and revenue_Bottle	0.0122279						Collected via curbside collection and going to MRFs	48636.9	2021 NextCycle Michigan Gap analysis
							PET bottles incinerated	459.591	Estimated, Conventional management of MSW disposed, 98% landfilled and 2% incinerated
Applications of PET in MI based on average employment and revenue							Total PET bottle waste generated	111793
Thermoforming	0.875948						PET generated in other packaging	20134.8	Adjusted based on per capita basis and EPA data
ISBM	0.124052						Other PET collected for sorting and recycling	1930.73
							Other PET landfilled	17840	Estimated, Conventional management of MSW disposed, 98% landfilled and 2% incinerated
MI no. of thermoformers	14	Source					Other PET incinerated	364.081	Estimated, Conventional management of MSW disposed, 98% landfilled and 2% incinerated
US no. of thermoformers	331						Total C&P PET waste generated	131928
MI contribution	0.0422961						Total C&P PET waste landfilled	40359.9
							Total C&P PET waste incinerated	823.672
MI no. of bottle converters	1	Source					Total C&P PET waste collected for sorting and recycling	90744.1
US no. of bottle converters	133						Total PET in non-durable	21238.1	Adjusted based on per capita and EPA data
MI contribution	0.0075188						lanfilled	20813.3	Estimated, Conventional management of MSW disposed, 98% landfilled and 2% incinerated
							Incinerated	424.761	Estimated, Conventional management of MSW disposed, 98% landfilled and 2% incinerated
Applications of PET in Michigan based on no. of converters (not used in this study)
Thermoformers	0.849065						Total PET in durable	18204.1	Adjusted based on per capita and EPA data
Bottle converters	0.150935						lanfilled	17840	Estimated, Conventional management of MSW disposed, 98% landfilled and 2% incinerated
							Incinerated	364.081	Estimated, Conventional management of MSW disposed, 98% landfilled and 2% incinerated
Total Exports of HTS Code 3915.90	5317.84	MT					Total PET waste generated	171370
Share of PET resin collected for sorting and recycling based on US EPA, excluding HDPE and LDPE/LLDPE	0.453704						Total post-consumer waste landfilled	79013.2
Share of PP resin collected for sorting and recycling based on US EPA, excluding HDPE and LDPE/LLDPE	0.0231481						Total post-consumer waste incinerated	1612.51
Share of other resins collected for sorting and recycling based on US EPA, excluding HDPE and LDPE/LLDPE	0.523148						Material Recovery Facility (MRF)
	1						Total PET through MRF	50567.6
Total PET, PP, and other resins excluding HDPE and LDPE/LLDPE	1959.52	MT					Total waste at MRF	5562.44	0.11
							Landfilled	5451.19	Estimated, Conventional management of MSW disposed, 98% landfilled and 2% incinerated
							Inicnerated	111.249	Estimated, Conventional management of MSW disposed, 98% landfilled and 2% incinerated
Transportation							output from MRF	45005.2
Plastics and rubber (NAICS Code 326)							Int'l. Import	0	Negligible
Total metrics tons of NAICS code 326 in Michigan	3.13741e+06	MT	Source				Int'l. Export	2412.72
Total metrics tons of NAICS code 326 in US	203935188	MT	Source
Michigan contribution to US	0.0153844						To Mechanical recycling
							PET to reclaimers	82769
							Waste at mechanical recycling	16553.8	0.2
							Landfilled	16222.7	Estimated, Conventional management of MSW disposed, 98% landfilled and 2% incinerated
							Incinerated	331.076	Estimated, Conventional management of MSW disposed, 98% landfilled and 2% incinerated
							Total R-PET produced	66215.2
1 US ton is equal to	0.907185	MT					R-PET in ISBM	8214.12	Same as that of applications of V-PET based on the availability of converters
							R-Pet in others	58001.1	Same as that of applications of V-PET based on the availability of converters
								22978

## Sheet: HDPE_MFA
		Comment
Michigan (MI) GDP of plastics and rubber product mfg ($ MM), 6th state, NAICS Code 326	4073.1	Source			Mass (MT)
US GDP of plastics and rubber product mfg ($ MM), NAICS Code 326	83799			V-HDPE use in Michigan	456007
MI contribution to US GDP of plastics and rubber product mfg, NAICS codes 326	0.0486056
				V-HDPE Injection molding	59280.9	13% of V-HDPE							Emissions (MT CO2-eq/MT)	Mass (MT)					Energy (MJ)
MI Employment in plastic product mfg, NAICS Code 3261	46989	Source		R-HDPE injection molding	4324.57							Virgin resin	734171					Virgin resin	3.36533e+10
US employment in plastic and product mfg, NAICS Code 3261	655529			Waste	381.633	0.6%, waste						Injection molding	65120.5	63223.8				Injection molding	1.65646e+09
MI contribution	0.071681			Virgin HDPE Total extrusion	168722	37% of V-HDPE						Extrusion	64612.1	181049				Extrusion	1.59225e+09
				R-HDPE total extrusion	14331.8							Film	26230.5	63512.2				Film	6.7958e+08
Avg. contribution of MI by GDP and Employment	0.0601433			V-HDPE Film extrusion	63840.9	14% of V-HDPE						Sheet	9892.16	28507.7				Sheet	2.36043e+08
				R-HDPE film extrusion	1233.04							Pipe	28489.4	89029.3				Pipe	6.76623e+08
V-HDPE available in the U.S.	7.582	MMT, Chaudhari et al., 2022		Waste	1561.78	2.4% waste						Blow molding	156795	156795				Blow molding	4.37457e+09
				V-HDPE Sheet extrusion	27360.4	6% of V-HDPE						All others	97070.5	86670.1				All others	2.28809e+09
Total HDPE and LDPE/LLDPE collected for recycling in MI	69411.3	MT		R-HDPE sheet extrusion	1233.04
HDPE	46731.6	MT		Waste	85.7803	0.3%, waste						Landfill	4030.21	183191				Landfill	5.67893e+07
	0.673257			V-HDPE Pipe extrusion	77521.1	17% of V-HDPE						Incineration with energy recovery	5322.63	3748.33				Incineration with energy recovery	-8.20884e+07
LDPE/LLDPE	22679.6	MT		R-HDPE pipe extrusion	11865.8							Compacting and baling	34.4774	1379.1				Compacting and baling	220655
	0.326743			Waste	357.548	0.4%, waste						MRF	3582.85	45352.5				MRF	5.46952e+07
				V-HDPE Blow Molding	141362	31% of V-HDPE						Mechanical recycling	16560.7	36169.4				Mechanical recycling	2.58122e+08
Total HDPE and LDPE/LLDPE after exports	66356.9	MT		R-HDPE blow molding	15904.4							Transportation	19123.5					Transportation	2.55917e+08
HDPE	44675.3	MT		Waste	471.799	0.3%, waste						Total	432252	MT CO2-eq				Total	1.0455e+10	MJ
	21681.6	MT		V-HDPE Other applications	86641.3	0.19							0.432252	MMT CO2-eq					10.455	PJ
				R-HDPE in others	1143.69
Total Exports of Waste PE, HTS Code 3915.10	3054.34	MT		Waste	1114.87	1.27%, waste						National HDPE supply chain GHG emissions	25.1	MMT CO2-eq				MI state energy consumption	3039	PJ
HDPE	2056.35	MT										MI state GHG emissiosn	190.89	MMT CO2-eq				Industrial sector energy consumption	744.025	PJ
LDPE/LLDPE	997.982	MT		Total post-industrial waste	3973.4
				Landfilled	3417.13	Refer to Methods section						MI contribution to U.S. HDPE supply chain	0.0172212					National HDPE supply chain energy consumption	890.3	PJ
				Incinerated	79.4681	Refer to Methods section						HDPE supply chain contribution to Michigan emissions	0.0022644
Transportation				To mechanical recycling	476.808	Refer to Methods section												MI contribution to U.S. HDPE supply chain	0.0117433
Plastics and rubber (NAICS Code 326)				Recycled resin	429.128	Due to lack of U.S. LCA data on post-industrial plastic waste, authors assumed to be 10% of loss, which is 50% of waste produced during mechanical recycling of post-consumer waste. Post-industrial plastic waste is comparatively clean or high-quality than post-consumer waste, and therefore would require much less pretreatment cleaning steps.												HDPE supply chain contribution to Michigan energy	0.00344029
Total metrics tons of NAICS code 326 in Michigan	2.86761e+06	MT	Source	landfilled	46.7272	Estimated, Conventional management of MSW disposed, 98% landfilled and 2% incinerated												HDPE supply chain contribution to Michigan industrial energy	0.014052
Total metrics tons of NAICS code 326 in US	203935188	MT	Source	Incinerated	0.953617	Estimated, Conventional management of MSW disposed, 98% landfilled and 2% incinerated
Michigan contribution to US	0.0140614			Int'l. Imports of semi-manufactured HDPE products	585.832
				Int'l. Exports of semi-manufactured HDPE products	561.288
				Net trade	24.544	'+' indicates net import and '-' indicates net exports
				Input to manufacturing sector	488324
				Output from manufacturing sector (exports + waste generated)	221753
				In-use stock	266570
1 US ton is equal to	0.907185	MT		EOL
				Containers and packaging (C&P)
				HDPE bottles landfilled	57087.3	2021 NextCycle Michigan Gap analysis
				N-HDPE	8272.62	2021 NextCycle Michigan Gap analysis
				C-HDPE	48814.7	2021 NextCycle Michigan Gap analysis
				HDPE bottles collected for sorting and recycling	53991.1	2021 NextCycle Michigan Gap analysis
				N-HDPE	7574.99	2021 NextCycle Michigan Gap analysis
				C-HDPE	46416.1	2021 NextCycle Michigan Gap analysis
				HDPE bottles incinerated	1165.05
				N-HDPE	168.829	Estimated, Conventional management of MSW disposed, 98% landfilled and 2% incinerated
				C-HDPE	996.219	Estimated, Conventional management of MSW disposed, 98% landfilled and 2% incinerated
				Total HDPE bottles generated	112244
				N-HDPE	16016.4
				C-HDPE	96227.1
				HDPE generated in bags, sacks, and wraps category	17652.4	Adjusted based on per capita and EPA data
				HDPE bags, sacks, and wraps collected for sorting and recycling	1379.1	Adjusted based on per capita and EPA data; Assumed to be collected via store-drop off centers
				landfilled	15947.9	Estimated, Conventional management of MSW disposed, 98% landfilled and 2% incinerated
				incinerated	325.467	Estimated, Conventional management of MSW disposed, 98% landfilled and 2% incinerated
				Total HDPE in other packaging	22065.5	Adjusted based on per capita and EPA data
				landfilled	21624.2	Estimated, Conventional management of MSW disposed, 98% landfilled and 2% incinerated
				incinerated	441.311	Estimated, Conventional management of MSW disposed, 98% landfilled and 2% incinerated
				Total C&P waste HDPE generated	151961
				Total C&P HDPE waste landfilled	94659.4
				Total C&P HDPE waste incinerated	1931.82
				Total C&P HDPE waste collected for sorting and recycling	55370.2
				Total HDPE in non-durable	25375.4	Adjusted based on per capita and EPA data
				lanfilled	24867.8	Estimated, Conventional management of MSW disposed, 98% landfilled and 2% incinerated
				Incinerated	507.507	Estimated, Conventional management of MSW disposed, 98% landfilled and 2% incinerated
				Total HDPE in durable	43855.2	Adjusted based on per capita and EPA data
				lanfilled	42978.1	Estimated, Conventional management of MSW disposed, 98% landfilled and 2% incinerated
				Incinerated	877.105	Estimated, Conventional management of MSW disposed, 98% landfilled and 2% incinerated
				Total HDPE waste generated	221192
				Total post-consumer waste landfilled	162505
				Total post-consumer waste incinerated	3316.44
				Material Recovery Facility (MRF)
				Total HDPE through MRF	53991.1
				Total waste at MRF	8638.58	0.16
				Landfilled	8465.81	Estimated, Conventional management of MSW disposed, 98% landfilled and 2% incinerated
				Inicnerated	172.772	Estimated, Conventional management of MSW disposed, 98% landfilled and 2% incinerated
				output from MRF	45352.5
				Int'l. Import	0
				Int'l. Export	2056.35
				To Mechanical recycling
				HDPE to reclaimers	44675.3
				Waste at mechanical recycling	8935.06	0.2
				Landfilled	8756.35	Estimated, Conventional management of MSW disposed, 98% landfilled and 2% incinerated
				Incinerated	178.701	Estimated, Conventional management of MSW disposed, 98% landfilled and 2% incinerated
				Total R-HDPE	35740.2
				R-HDPE in injection molding	4324.57	Assumed same as that of U.S. end-use applications due to lack of data, Chaudhari et al., 2022
				R-HDPE in extrusion	14331.8	Assumed same as that of U.S. end-use applications due to lack of data, Chaudhari et al., 2022
				R-HDPE in blow molding	15904.4	Assumed same as that of U.S. end-use applications due to lack of data, Chaudhari et al., 2022
				R-HDPE in other applications	1143.69	Assumed same as that of U.S. end-use applications due to lack of data, Chaudhari et al., 2022

## Sheet: HDPE_Scenario_MFA
		Comment
Michigan (MI) GDP of plastics and rubber product mfg ($ MM), 6th state, NAICS Code 326	4073.1	Source			Mass (MT)
US GDP of plastics and rubber product mfg ($ MM), NAICS Code 326	83799			V-HDPE use in Michigan	436864
MI contribution to US GDP of plastics and rubber product mfg, NAICS codes 326	0.0486056
				V-HDPE Injection molding	56792.4	13% of V-HDPE							Emissions (MT CO2-eq/MT)	Mass (MT)					Energy (MJ)
MI Employment in plastic product mfg, NAICS Code 3261	46989	Source		R-HDPE injection molding	6640.79							Virgin resin	703352					Virgin resin	3.22406e+10
US employment in plastic and product mfg, NAICS Code 3261	655529			Waste	380.599	0.6%, waste						Injection molding	64944.1	63052.5				Injection molding	1.65198e+09
MI contribution	0.071681			Virgin HDPE Total extrusion	161640	37% of V-HDPE						Extrusion	64617.5	181680				Extrusion	1.5906e+09
				R-HDPE total extrusion	22007.9							Film	25416.5	61541.1				Film	6.5849e+08
Avg. contribution of MI by GDP and Employment	0.0601433			V-HDPE Film extrusion	61161	14% of V-HDPE						Sheet	9723.28	28021				Sheet	2.32014e+08
				R-HDPE film extrusion	1893.45							Pipe	29477.8	92118				Pipe	7.00097e+08
V-HDPE available in the U.S.	7.582	MMT, Chaudhari et al., 2022		Waste	1513.31	2.4% waste						Blow molding	159371	159371				Blow molding	4.44645e+09
				V-HDPE Sheet extrusion	26211.9	6% of V-HDPE						All others	93726.1	83684				All others	2.20926e+09
Total HDPE and LDPE/LLDPE collected for recycling	69411.3	MT		R-HDPE sheet extrusion	1893.45
HDPE	46731.6	MT		Waste	84.3159	0.3%, waste						Landfill	3616.17	164372				Landfill	5.09552e+07
	0.673257			V-HDPE Pipe extrusion	74266.9	17% of V-HDPE						Incineration with energy recovery	4777	3364.08				Incineration with energy recovery	-7.36734e+07
LDPE/LLDPE	22679.6	MT		R-HDPE pipe extrusion	18221							Compacting and baling	34.4774	1379.1				Compacting and baling	220655
	0.326743			Waste	369.952	0.4%, waste						MRF	5473.16	69280.4				MRF	8.35522e+07
				V-HDPE Blow Molding	135428	31% of V-HDPE						Mechanical recycling	25364	55304.2				Mechanical recycling	3.9534e+08
Total HDPE and LDPE/LLDPE after exports	66356.9	MT		R-HDPE blow molding	24422.7							Transportation	20922.7					Transportation	2.79995e+08
HDPE	44675.3	MT		Waste	479.552	0.3%, waste						Total	442846	MT CO2-eq				Total	1.06347e+10	MJ
LDPE/LLDPE	21681.6	MT		V-HDPE Other applications	83004.2	0.19							0.442846	MMT CO2-eq					10.6347	PJ
				R-HDPE in others	1756.24							Avoided emissions	-30819.2	MT CO2-eq				Avoided energy	-1.4127e+09	MJ
Total Exports of Waste PE, HTS Code 3915.10	3054.34	MT		Waste	1076.46	1.27%, waste						Net	0.412027	MMT CO2-eq				Net	9.22198	PJ
HDPE	2056.35	MT
LDPE/LLDPE	997.982	MT		Total post-industrial waste	3904.18							National HDPE supply chain GHG emissions	25.1	MMT CO2-eq				MI state energy consumption	3039	PJ
				Landfilled	3357.6	Refer to Methods section						MI state GHG emissiosn	190.89	MMT CO2-eq				Industrial sector energy consumption	744.025	PJ
				Incinerated	78.0837	Refer to Methods section
Transportation				To mechanical recycling	468.502	Refer to Methods section						MI contribution to U.S. HDPE supply chain	0.0164154					National HDPE supply chain energy consumption	890.3	PJ
Plastics and rubber (NAICS Code 326)				Recycled resin	421.652	Due to lack of U.S. LCA data on post-industrial plastic waste, authors assumed to be 10% of loss, which is 50% of waste produced during mechanical recycling of post-consumer waste. Post-industrial plastic waste is comparatively clean or high-quality than post-consumer waste, and therefore would require much less pretreatment cleaning steps.						HDPE supply chain contribution to Michigan emissions	0.00215845
Total metrics tons of NAICS code 326 in Michigan	3.13741e+06	MT	Source	landfilled	45.9132	Estimated, Conventional management of MSW disposed, 98% landfilled and 2% incinerated												MI contribution to U.S. HDPE supply chain	0.0103583
Total metrics tons of NAICS code 326 in US	203935188	MT	Source	Incinerated	0.937004	Estimated, Conventional management of MSW disposed, 98% landfilled and 2% incinerated												HDPE supply chain contribution to Michigan energy	0.00303454
Michigan contribution to US	0.0153844			Int'l. Imports of semi-manufactured HDPE products	585.832													HDPE supply chain contribution to Michigan industrial energy	0.0123947
				Int'l. Exports of semi-manufactured HDPE products	561.288
				Net trade	24.544	'+' indicates net import and '-' indicates net exports
				Input to manufacturing sector	488374
				Output from manufacturing sector (exports + waste generated)	221753
				In-use stock	266620
				EOL
				Containers and packaging (C&P)
				HDPE bottles landfilled	29171.4	2021 NextCycle Michigan Gap analysis
				N-HDPE	4360.84	2021 NextCycle Michigan Gap analysis
				C-HDPE	24810.6	2021 NextCycle Michigan Gap analysis
				HDPE bottles collected for sorting and recycling	82476.7	2021 NextCycle Michigan Gap analysis
				N-HDPE	11566.6	2021 NextCycle Michigan Gap analysis
				C-HDPE	70910.1	2021 NextCycle Michigan Gap analysis
				HDPE bottles incinerated	595.336
				N-HDPE	88.9967	Estimated, Conventional management of MSW based on 2016 EGLE
				C-HDPE	506.339
				Total HDPE bottles generated	112244
				N-HDPE	16016.4
				C-HDPE	96227.1
				HDPE generated in bags, sacks, and wraps category	17652.4	Adjusted based on per capita and EPA data
				HDPE bags, sacks, and wraps collected for sorting and recycling	1379.1	Adjusted based on per capita and EPA data; Assumed to be collected via store-drop off centers
				landfilled	15947.9	Estimated, Conventional management of MSW disposed, 98% landfilled and 2% incinerated
				incinerated	325.467	Estimated, Conventional management of MSW disposed, 98% landfilled and 2% incinerated
				Total HDPE in other packaging	22065.5	Adjusted based on per capita and EPA data
				landfilled	21624.2	Estimated, Conventional management of MSW disposed, 98% landfilled and 2% incinerated
				incinerated	441.311	Estimated, Conventional management of MSW disposed, 98% landfilled and 2% incinerated
				Total C&P waste HDPE generated	151961
				Total C&P HDPE waste landfilled	66743.5
				Total C&P HDPE waste incinerated	1362.11
				Total C&P HDPE waste collected for sorting and recycling	83855.8
				Total HDPE in non-durable	25375.4	Adjusted based on per capita and EPA data
				lanfilled	24867.8	Estimated, Conventional management of MSW disposed, 98% landfilled and 2% incinerated
				Incinerated	507.507	Estimated, Conventional management of MSW disposed, 98% landfilled and 2% incinerated
				Total HDPE in durable	43855.2	Adjusted based on per capita and EPA data
				lanfilled	42978.1	Estimated, Conventional management of MSW disposed, 98% landfilled and 2% incinerated
				Incinerated	877.105	Estimated, Conventional management of MSW disposed, 98% landfilled and 2% incinerated
				Total HDPE waste generated	221192
				Total post-consumer waste landfilled	134589
				Total post-consumer waste incinerated	2746.72
				Material Recovery Facility (MRF)
				Total HDPE through MRF	82476.7
				Total waste at MRF	13196.3	0.16
				Landfilled	12932.4	Estimated, Conventional management of MSW disposed, 98% landfilled and 2% incinerated
				Inicnerated	263.926	Estimated, Conventional management of MSW disposed, 98% landfilled and 2% incinerated
				output from MRF	69280.4
				Int'l. Import	0
				Int'l. Export	2056.35
				To Mechanical recycling
				HDPE to reclaimers	68603.2
				Waste at mechanical recycling	13720.6	0.2
				Landfilled	13446.2	Estimated, Conventional management of MSW disposed, 98% landfilled and 2% incinerated
				Incinerated	274.413	Estimated, Conventional management of MSW disposed, 98% landfilled and 2% incinerated
				Total R-HDPE	54882.6
				R-HDPE in injection molding	6640.79	Assumed same as that of U.S. end-use applications due to lack of data, Chaudhari et al., 2022
				R-HDPE in extrusion	22007.9	Assumed same as that of U.S. end-use applications due to lack of data, Chaudhari et al., 2022
				R-HDPE in blow molding	24422.7	Assumed same as that of U.S. end-use applications due to lack of data, Chaudhari et al., 2022
				R-HDPE in other applications	1756.24	Assumed same as that of U.S. end-use applications due to lack of data, Chaudhari et al., 2022
					19142.3

## Sheet: LDPE_LLDPE_MFA
		Comment
Michigan (MI) GDP of plastics and rubber product mfg ($ MM), 6th state, NAICS Code 326	4073.1	Source			Mass (MT)
US GDP of plastics and rubber product mfg ($ MM), NAICS Code 326	83799			V-LDPE/LLDPE use in Michigan	655201
MI contribution to US GDP of plastics and rubber product mfg, NAICS codes 326	0.0486056
				Injection molding	13104	2% of V-LDPE/LLDPE							Emissions (MT CO2-eq/MT)	Mass (MT)			Energy (MJ)
MI Employment in plastic product mfg, NAICS Code 3261	46989	Source		Waste	78.6242	0.6% waste						Virgin resin	1.04452e+06			Virgin resin	4.90254e+10
US employment in plastic and product mfg, NAICS Code 3261	655529			Total extrusion	471745							Injection molding	13416.2	13025.4		Injection molding	3.41266e+08
MI contribution	0.071681			Film extrusion	386569	59% of V-LDPE/LLDPE						Extrusion	186377	462169		Extrusion	4.78903e+09
				Waste	9277.65	2.4% waste						Film	155821	377291		Film	4.03701e+09
Avg. contribution of MI by GDP and Employment	0.0601433			Other extruded products	85176.2	13% of V-LDPE/LLDPE						Other extruded products	30556.1	84878		Other extruded products	7.5202e+08
				Waste	298.117	0.35% waste						All others	114100	169177		All others	2.73841e+09
V-LDPE/LLDPE available in the U.S.	10.894	MMT, Chaudhari et al., 2022		Other applications	170352	26% of V-LDPE/LLDPE						Landfill	11841.5	538251		Landfill	1.66858e+08
				Waste	1175.43	0.0069						Incineration with energy recovery	15636	11011.2		Incineration with energy recovery	-2.40155e+08
				Total post-industrial waste	10829.8							Compacting and baling	566.991	22679.6		Compacting and baling	3628740
Transportation				landfilled	9313.65	Refer to Methods section						Mechanical recycling	257.317	1169.62		Mechanical recycling	4.21648e+06
Plastics and rubber (NAICS Code 326)				Incinerated	216.596	Refer to Methods section						Transportation	23904.4			Transportation	3.17787e+08
Total metrics tons of NAICS code 326 in Michigan	2.86761e+06	MT	Source	to mechanical recycling	1299.58	Refer to Methods section						Total	366100	MT CO2-eq		Total	8.12105e+09	MJ
Total metrics tons of NAICS code 326 in US	203935188	MT	Source	Recycled resin	1169.62	Due to lack of U.S. LCA data on post-industrial plastic waste, authors assumed to be 10% of loss, which is 50% of waste produced during mechanical recycling of post-consumer waste. Post-industrial plastic waste is comparatively clean or high-quality than post-consumer waste, and therefore would require much less pretreatment cleaning steps.							0.3661	MMT CO2-eq			8.12105	PJ
Michigan contribution to US	0.0140614			landfilled	127.359	Estimated, Conventional management of MSW disposed, 98% landfilled and 2% incinerated
				Incinerated	2.59916	Estimated, Conventional management of MSW disposed, 98% landfilled and 2% incinerated						National LDPE/LLDPE Supply chain GHG emissions	29.4	MMT CO2-eq		MI state energy consumption	3039	PJ
				Int'l. Imports of semi-manufactured LDPE/LLDPE products	525.319							MI state GHG emissiosn	190.89	MMT CO2-eq		Industrial sector energy consumption	744.025	PJ
				Int'l. Exports of semi-manufactured LDPE/LLDPE products	265.66
				Net trade	259.658	'+' indicates net import and '-' indicates net exports										National LDPE/LLDPE Supply chain energy consumption	1072.8	PJ
				Input to manufacturing sector	644897							MI contribution to U.S. LDPE/LLDPE supply chain	0.0124524
				Output from manufacturing sector (exports + waste generated)	562548							LDPE/LLDPE supply chain contribution to Michigan emissions	0.00191786			MI contribution to U.S. LDPE/LLDPE supply chain	0.00756995
				In-use stock	82349.2											LDPE/LLDPE supply chain contribution to Michigan energy	0.00267228
																LDPE/LLDPE supply chain contribution to Michigan industrial energy	0.010915
1 US ton is equal to	0.907185	MT		EOL
				Containers and packaging (C&P)
				LDPE/LLDPE film landfilled	371764	2021 NextCycle Michigan Gap analysis
				LDPE/LLDPE film collected for recycling	22679.6	2021 NextCycle Michigan Gap analysis, Collected via commercial/store drop-off collection programs
				LDPE/LLFPE film incinerated	7587.03	Estimated, Conventional management of MSW disposed, 98% landfilled and 2% incinerated
				Total LDPE/LLDPE film generated	402031
				Other LDPE/LLDPE containers	1103.28	Adjusted based on per capita and EPA data
				landfilled	1081.21	Estimated, Conventional management of MSW disposed, 98% landfilled and 2% incinerated
				incinerated	22.0655	Estimated, Conventional management of MSW disposed, 98% landfilled and 2% incinerated
				Other LDPE/LLDPE packaging	25099.5	Adjusted based on per capita and EPA data
				landfilled	24597.5	Estimated, Conventional management of MSW disposed, 98% landfilled and 2% incinerated
				incinerated	501.991	Estimated, Conventional management of MSW disposed, 98% landfilled and 2% incinerated
				Total LDPE/LLDPE waste in C&P	428234
				Total C&P LDPE/LLDPE waste landfilled	397443
				Total C&P LDPE/LLDPE waste incinerated	8111.09
				Total C&P LDPE/LLDPE waste collected for recycling	22679.6
				Total LDPE/LLDPE waste in Non-durable	75298.6	Adjusted based on per capita and EPA data
				Landfilled	73792.6	Estimated, Conventional management of MSW disposed, 98% landfilled and 2% incinerated
				Incinerated	1505.97	Estimated, Conventional management of MSW disposed, 98% landfilled and 2% incinerated
				Total LDPE/LLDPE waste in Durable	58749.5	Adjusted based on per capita and EPA data
				Landfilled	57574.5	Estimated, Conventional management of MSW disposed, 98% landfilled and 2% incinerated
				Incinerated	1174.99	Estimated, Conventional management of MSW disposed, 98% landfilled and 2% incinerated
				Total LDPE/LLDPE waste generated	562282
				Total post-consumer waste landfilled	528810
				Total post-consumer waste incinerated	10792
				Int'l. Import	0
				Int'l. Export	997.982
				Net LDPE/LLDPE to mechanical recycling	21681.6

## Sheet: LDPE_LLDPE_Scenario_MFA
		Comment
MI GDP of plastics and rubber product mfg ($ MM), 6th state, NAICS Code 326	4073.1	Source			Mass (MT)
US GDP of plastics and rubber product mfg ($ MM), NAICS Code 326	83799			V-LDPE/LLDPE use in Michigan	495755
MI contribution to US GDP of plastics and rubber product mfg, NAICS codes 326	0.0486056
				Injection molding	44993.4	2% of V-LDPE/LLDPE							Emissions (MT CO2-eq/MT)	Mass (MT)			Energy (MJ)
MI Employment in plastic product mfg, NAICS Code 3261	46989	Source		Waste	269.96	0.6% waste						Virgin resin	790332			Virgin resin	3.70948e+10
US employment in plastic and product mfg, NAICS Code 3261	655529			Total extrusion	457395							Injection molding	46065.1	44723.4		Injection molding	1.17175e+09
MI contribution	0.071681			Film extrusion	342721	59% of V-LDPE/LLDPE						Extrusion	179285	448768		Extrusion	4.59156e+09
				Waste	8225.3	2.4% waste						Film	138147	334496		Film	3.5791e+09
Avg. contribution of MI by GDP and Employment	0.0601433			Other extruded products	114674	13% of V-LDPE/LLDPE						Other extruded products	41138.1	114272		Other extruded products	1.01245e+09
				Waste	401.358	0.35% waste						All others	102353	151759		All others	2.45647e+09
V-LDPE/LLDPE available in the U.S.	10.894	MMT, Chaudhari et al., 2022		Other applications	152813	26% of V-LDPE/LLDPE						Landfill	8854.46	402475		Landfill	1.24767e+08
				Waste	1054.41	0.0069						Incineration with energy recovery	11698.2	8238.15		Incineration with energy recovery	-1.79674e+08
				Total post-industrial waste	9951.03							Compacting and baling	5007.66	200306		Compacting and baling	3.2049e+07
Transportation				landfilled	8557.89	Refer to Methods section						Mechanical recycling	70393	160521		Mechanical recycling	1.15349e+09
Plastics and rubber (NAICS Code 326)				Incinerated	199.021	Refer to Methods section						Transportation	26153.4			Transportation	3.47686e+08
Total metrics tons of NAICS code 326 in Michigan	3.13741e+06	MT	Source	to mechanical recycling	1194.12	Refer to Methods section						Total	449809	MT CO2-eq		Total	9.69809e+09	MJ
Total metrics tons of NAICS code 326 in US	203935188	MT	Source	Recycled resin	1074.71	Due to lack of U.S. LCA data on post-industrial plastic waste, authors assumed to be 10% of loss, which is 50% of waste produced during mechanical recycling of post-consumer waste. Post-industrial plastic waste is comparatively clean or high-quality than post-consumer waste, and therefore would require much less pretreatment cleaning steps.							0.449809	MMT CO2-eq			9.69809	PJ
Michigan contribution to US	0.0153844			landfilled	117.024	Estimated, Conventional management of MSW disposed, 98% landfilled and 2% incinerated						Avoided emissions	-254190	MT CO2-eq		Avoided energy	-1.19306e+10	MJ
				Incinerated	2.38825	Estimated, Conventional management of MSW disposed, 98% landfilled and 2% incinerated						Net	0.195619	MMT CO2-eq		Net	-2.23251	PJ
				Int'l. Imports of semi-manufactured LDPE/LLDPE products	525.319
				Int'l. Exports of semi-manufactured LDPE/LLDPE products	265.66							National LDPE/LLDPE Supply chain GHG emissions	29.4	MMT CO2-eq		MI state energy consumption	3039	PJ
				Net trade	259.658	'+' indicates net import and '-' indicates net exports						MI state GHG emissiosn	190.89	MMT CO2-eq		Industrial sector energy consumption	744.025	PJ
				Input to manufacturing sector	645776
				Output from manufacturing sector (exports + waste generated)	562548											National LDPE/LLDPE Supply chain energy consumption	1072.8	PJ
				In-use stock	83228							MI contribution to U.S. LDPE/LLDPE supply chain	0.00665372
												LDPE/LLDPE supply chain contribution to Michigan emissions	0.00102478			MI contribution to U.S. LDPE/LLDPE supply chain	-0.00208101
				EOL												LDPE/LLDPE supply chain contribution to Michigan energy	-0.00073462
				Containers and packaging (C&P)												LDPE/LLDPE supply chain contribution to Michigan industrial energy	-0.00300058
				LDPE/LLDPE film landfilled	197690	2021 NextCycle Michigan Gap analysis
				LDPE/LLDPE film collected for recycling	200306	2021 NextCycle Michigan Gap analysis, Collected via commercial/store drop-off collection programs
				LDPE/LLFPE film incinerated	4034.49	Estimated, Conventional management of MSW disposed, 98% landfilled and 2% incinerated
				Total LDPE/LLDPE film generated	402031
				Other LDPE/LLDPE containers	1103.28	Adjusted based on per capita and EPA data
				landfilled	1081.21	Estimated, Conventional management of MSW disposed, 98% landfilled and 2% incinerated
				incinerated	22.0655	Estimated, Conventional management of MSW disposed, 98% landfilled and 2% incinerated
				Other LDPE/LLDPE packaging	25099.5	Adjusted based on per capita and EPA data
				landfilled	24597.5	Estimated, Conventional management of MSW disposed, 98% landfilled and 2% incinerated
				incinerated	501.991	Estimated, Conventional management of MSW disposed, 98% landfilled and 2% incinerated
				Total LDPE/LLDPE waste in C&P	428234
				Total C&P LDPE/LLDPE waste landfilled	223369
				Total C&P LDPE/LLDPE waste incinerated	4558.55
				Total C&P LDPE/LLDPE waste collected for recycling	200306
				Total LDPE/LLDPE waste in Non-durable	75298.6	Adjusted based on per capita and EPA data
				Landfilled	73792.6	Estimated, Conventional management of MSW disposed, 98% landfilled and 2% incinerated
				Incinerated	1505.97	Estimated, Conventional management of MSW disposed, 98% landfilled and 2% incinerated
				Total LDPE/LLDPE waste in Durable	58749.5	Adjusted based on per capita and EPA data
				Landfilled	57574.5	Estimated, Conventional management of MSW disposed, 98% landfilled and 2% incinerated
				Incinerated	1174.99	Estimated, Conventional management of MSW disposed, 98% landfilled and 2% incinerated
				Total LDPE/LLDPE waste generated	562282
				Total post-consumer waste landfilled	354736
				Total post-consumer waste incinerated	7239.51
				Int'l. Import	0
				Int'l. Export	997.982
				To Mechanical recycling
				Net LDPE/LLDPE to mechanical recycling	199308
				Waste at mechanical recycling	39861.7
				Landfilled	39064.5	Estimated, Conventional management of MSW disposed, 98% landfilled and 2% incinerated
				Incinerated	797.234	Estimated, Conventional management of MSW disposed, 98% landfilled and 2% incinerated
				Total R-LDPE/LLDPE	159447
					35078.3	22% in injection molding
					50225.7	31.5 % in film extrusion
					50225.7	31.5 % in other etruded products
					23917	15% in other applications

## Sheet: PP_MFA
		Comment
MI GDP of plastics and rubber product mfg ($ MM), 6th state, NAICS Code 326	4073.1	Source				Mass (MT)								Emissions (MT CO2-eq/MT)	Mass (MT)					Energy (MJ)
US GDP of plastics and rubber product mfg ($ MM), NAICS Code 326	83799				V-PP use in Michigan	412583							Virgin resin	639504					Virgin resin	3.115e+10
MI contribution to US GDP of plastics and rubber product mfg, NAICS codes 326	0.0486056												Injection molding	126723	123032				Injection molding	3.22345e+09
					Injection molding	123775	30% of V-PP						Extrusion	322046	145510				Extrusion	7.08674e+09
MI Employment in plastic product mfg, NAICS Code 3261	46989	Source			Waste	742.65	0.6% waste						Film extrusion	14967.7	36241.3				Film extrusion	3.87782e+08
US employment in plastic and product mfg, NAICS Code 3261	655529				Total extrusion	148530							Sheet extrusion	17128.4	49361.4				Sheet extrusion	4.08713e+08
MI contribution	0.071681				Film extrusion	37132.5	9% of V-PP						Fiber extrusion	289950	59907.1				Fiber extrusion	6.29024e+09
					Waste	891.18	2.4% waste						Blow molding	4113.45	4113.45				Blow molding	1.14765e+08
Avg. contribution of MI by GDP and Employment	0.0601433				Sheet extrusion	49510	12% of V-PP						Other applications	84152.4	134764				Other applications	2.1122e+09
					Waste	148.53	0.3%, waste
V-PP available in the U.S.	6.86	MMT, Chaudhari et al 2022			Fiber extrusion	61887.5	15% of V-PP						Landfill	5265.25	239329				Landfill	7.41921e+07
					Waste	1980.4	3.2% waste						Incineration with energy recovery	6953.63	4896.92				Incineration with energy recovery	-1.06998e+08
					Blow molding	4125.83	1% of V-PP						MRF	398.04	4472.36				MRF	5.96166e+06
Transportation					Waste	12.3775	0.3%, waste						Mechanical recycling	147.791	557.7				Mechanical recycling	2.47898e+06
Plastics and rubber (NAICS Code 326)					Other applications	136152	33% of V-PP						Transportation	14764.5					Transportation	1.96859e+08
Total metrics tons of NAICS code 326 in Michigan	2.86761e+06	MT	Source		Waste	1388.75	1.02% waste						Total	564565	MT CO2-eq				Total	1.27096e+10	MJ
Total metrics tons of NAICS code 326 in US	203935188	MT	Source											0.564565	MMT CO2-eq					12.7096	PJ
Michigan contribution to US	0.0140614				Total post-industrial waste	5163.89
					landfilled	4440.95	Refer to Methods section						National PP Supply chain GHG emissions	23.3	MMT CO2-eq				MI state energy consumption	3039	PJ
					incinerated	103.278	Refer to Methods section						MI state GHG emissiosn	190.89	MMT CO2-eq				Industrial sector energy consumption	744.025	PJ
					To mechanical recycling	619.667	Refer to Methods section
					Recycled resins	557.7	Due to lack of U.S. LCA data on post-industrial plastic waste, authors assumed to be 10% of loss, which is 50% of waste produced during mechanical recycling of post-consumer waste. Post-industrial plastic waste is comparatively clean or high-quality than post-consumer waste, and therefore would require much less pretreatment cleaning steps.												National PP Supply chain energy consumption	763.6	PJ
					landfilled	60.7274	Estimated, Conventional management of MSW disposed, 98% landfilled and 2% incinerated						MI contribution to U.S. PP supply chain	0.0242302
					incinerated	1.23933	Estimated, Conventional management of MSW disposed, 98% landfilled and 2% incinerated						PP supply chain contribution to Michigan emissions	0.00295754
					Int'l. Imports of semi-manufactured PP products	4377.75													MI contribution to U.S. PP supply chain	0.0166444
					Int'l. Exports of semi-manufactured PP products	932.951													PP supply chain contribution to Michigan energy	0.00418218
1 US ton is equal to	0.907185	MT			Net trade	3444.8	'+' indicates net import and '-' indicates net exports												PP supply chain contribution to Michigan industrial energy	0.0170823
					Input to manufacturing sector	411797
					Output from manufacturing sector (exports + waste generated)	245025
					In-use stock	166772
					EOL
					Containers and packaging (C&P)
					PP landfilled	21137.4	2021 NextCycle Michigan Gap analysis
					PP collected for recycling	4626.64	2021 NextCycle Michigan Gap analysis
					PP incinerated	431.376	Estimated, Conventional management of MSW disposed, 98% landfilled and 2% incinerated
					Total PP containers waste generated	26195.4
					Other PP plastic packaging waste generated	27857.7	Adjusted based on per capita and EPA data
					Other PP packging collected for recycling	827.457	Adjusted based on per capita and EPA data
					Other PP packaging lanfilled	26489.7	Estimated, Conventional management of MSW disposed, 98% landfilled and 2% incinerated
					Other PP packaging incinerated	540.605	Estimated, Conventional management of MSW disposed, 98% landfilled and 2% incinerated
					PP in bags sacks and wraps	15721.7	Adjusted based on per capita and EPA data
					Landfilled	15407.3	Estimated, Conventional management of MSW disposed, 98% landfilled and 2% incinerated
					incinerated	314.434	Estimated, Conventional management of MSW disposed, 98% landfilled and 2% incinerated
					Total PP in C&P	69774.8
					Total C&P PP waste landfilled	63034.3
					Total C&P PP waste incinerated	1286.41
					Total C&P PP waste collected for sorting and recycling	5454.1
					PP in Non-durable	47716.7	Adjusted based on per capita and EPA data
					landfilled	46762.4	Estimated, Conventional management of MSW disposed, 98% landfilled and 2% incinerated
					incinerated	954.334	Estimated, Conventional management of MSW disposed, 98% landfilled and 2% incinerated
					PP in durable	126601	Adjusted based on per capita and EPA data
					landfilled	124069	Estimated, Conventional management of MSW disposed, 98% landfilled and 2% incinerated
					incinerated	2532.02	Estimated, Conventional management of MSW disposed, 98% landfilled and 2% incinerated
					Total PP waste generated	244093
					Total post-consumer waste landfilled	233866
					Total post-consumer waste incinerated	4772.77
					Total post-consumer waste collected for sorting and recycling	5454.1
					Material Recovery Facility (MRF)
					Total PET through MRF	5454.1
					Total waste at MRF	981.738	0.18
					Landfilled	962.103	Estimated, Conventional management of MSW disposed, 98% landfilled and 2% incinerated
					Inicnerated	19.6348	Estimated, Conventional management of MSW disposed, 98% landfilled and 2% incinerated
					output from MRF	4472.36
					Int'l. Import	0
					Int'l. Export	123.098
					Net PP for recycling	4349.26

[truncated: 6 more sheets: PP_Scenarios_MFA, NextCycle Scenario, Socio-economic Impacts, NAICS Codes Data_2019, U.S. Post-consumer Waste Mgmt, Trade Data]
